# Supplementary material
Source: PubMed Central journal article supplement (PMC2812937)
Supplement: cb900194x_si_001.pdf [file cb900194x_si_001.pdf]

# INSIGHTS INTO THE MODE OF ACTION OF THE TWO-PEPTIDE LANTIBIOTIC HALODURACIN SUPPORTING INFORMATION

Trent J. Oman and Wilfred A. van der Donk\*  
Department of Chemistry, University of Illinois at Urbana-Champaign  
and the Howard Hughes Medical Institute,  
600 S. Mathews Avenue  
Urbana, Illinois 61801  
Phone 217 244 5360, FAX 217 244 8533  
vddonk@illinois.edu

**Figure S1.** MALDI-TOF mass spectrum of purified Hal $\alpha$ .

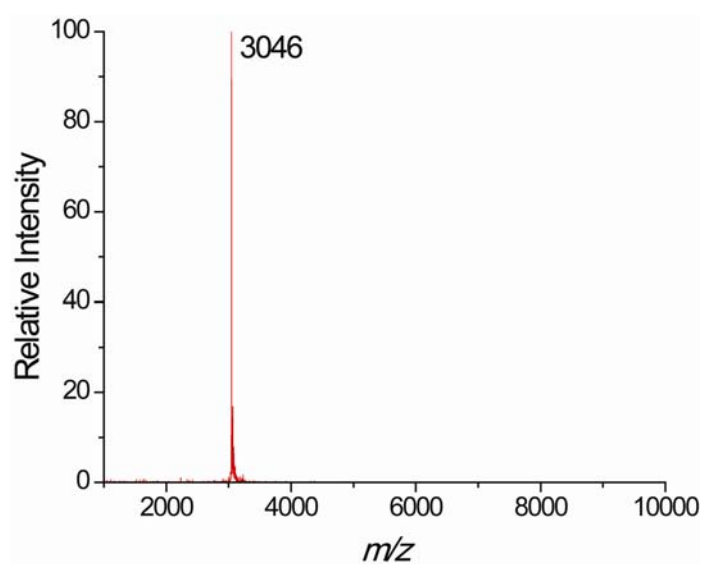

**Figure S2.** MALDI-TOF mass spectrum of purified Hal $\beta$ .

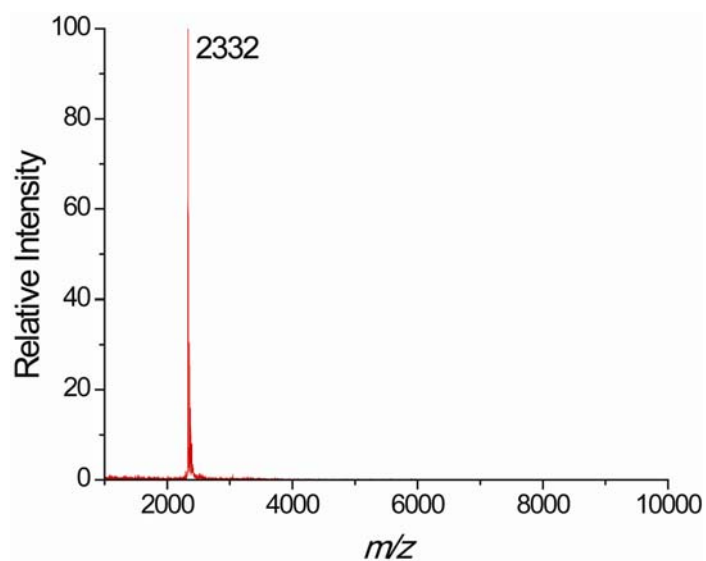

**Figure S3.** MALDI-TOF mass spectrum of purified nisin.

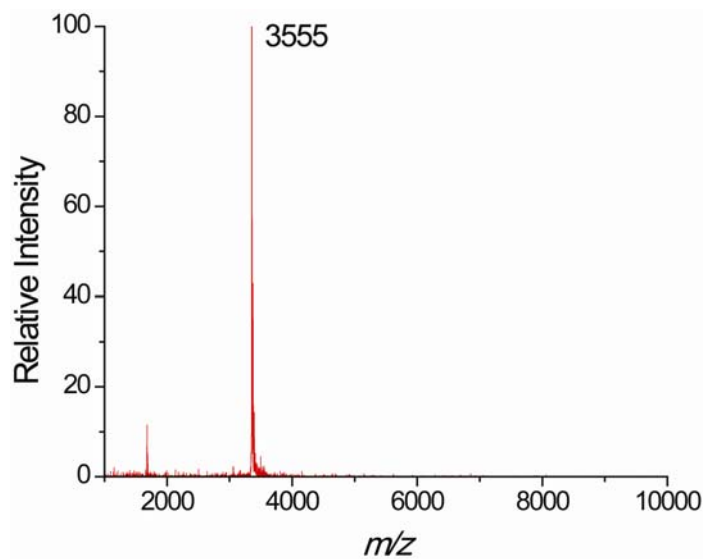

**Figure S4.** Hal $\alpha$  mutants generated for this study. Shaded spheres indicate mutated residues.

**Hal $\alpha$  wild-type**

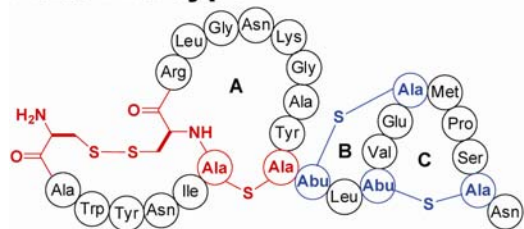

**Hal $\alpha$  C27A**

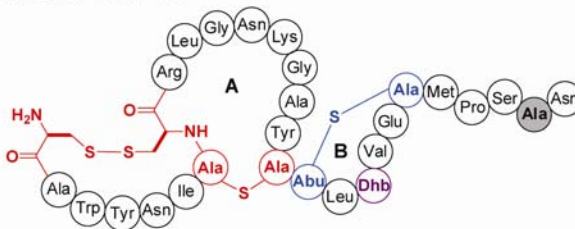

**Hal $\alpha$  C23A**

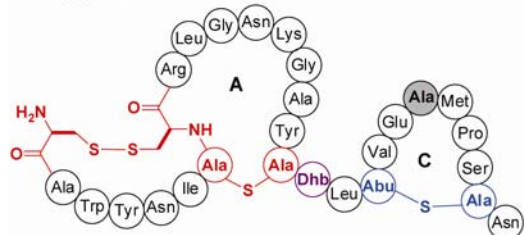

**Hal $\alpha$  E22Q**

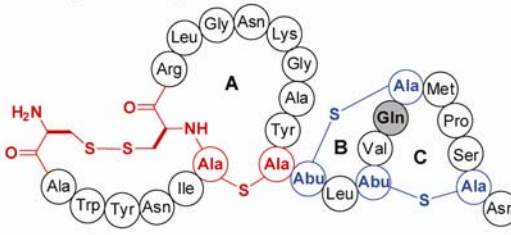

**Table S1.** Growth conditions for strains used in this study.

| Strain                                             | Source                         | Media | Conditions       |
|----------------------------------------------------|--------------------------------|-------|------------------|
| <i>Bacillus halodurans</i> C-125                   | ATCC BAA-125                   | LB    | 30 °C, aerobic   |
| <i>Lactococcus lactis</i> HP                       | ATCC 11602                     | GM17  | 30 °C, anaerobic |
| <i>Lactococcus lactis</i> 481                      | CNRZ 481                       | GM17  | 30 °C, anaerobic |
| <i>Lactococcus lactis</i> 11454                    | ATCC 11454                     | GM17  | 30 °C, anaerobic |
| Vancomycin-resistant <i>Enterococcus faecium</i>   | C33105*                        | BHI   | 37 °C, aerobic   |
| <i>Bacillus anthracis</i> Sterne 7702              | Gut, I. M. <i>et al.</i> (1)   | BHI   | 30 °C, aerobic   |
| <i>Bacillus subtilis</i>                           | ATCC 6633                      | LB    | 30 °C, aerobic   |
| Methicillin-resistant <i>Staphylococcus aureus</i> | C5*                            | BHI   | 37 °C, aerobic   |
| <i>Staphylococcus aureus</i>                       | ATCC 12600                     | BHI   | 37 °C, aerobic   |
| <i>Staphylococcus epidermidis</i> 15X              | Ekkelenkamp. <i>et al.</i> (2) | MHB   | 37 °C, aerobic   |
| <i>Micrococcus luteus</i>                          | ATCC 4698                      | LB    | 37 °C, aerobic   |
| <i>Streptococcus mutans</i>                        | ATCC 25175                     | TH    | 37 °C, aerobic   |
| <i>Lactococcus lactis</i> 117                      | CNRZ 117                       | GM17  | 30 °C, anaerobic |
| <i>Bacillus subtilis</i> DB104                     | Kawamura, F. <i>et al.</i> (3) | LB    | 30 °C, aerobic   |
| <i>Bacillus subtilis</i> LH45                      | Liu, W. <i>et al.</i> (4)      | LB    | 30 °C, aerobic   |
| <i>Bacillus cereus</i> Z4222                       | INRA Z4222                     | LB    | 30 °C, aerobic   |
| <i>Bacillus cereus</i> TZ415                       | INRA TZ415                     | LB    | 30 °C, aerobic   |
| <i>Enterobacter cloacae</i> 10-19C                 | ATCC 29893                     | LB    | 37 °C, aerobic   |
| <i>Escherichia coli</i> DH5 $\alpha$               | UIUC-CMF                       | LB    | 37 °C, aerobic   |

Notes: ATCC: American Type Culture Collection, CNRZ: National Centre for Zootechnical Research, INRA: Institut National de la Recherche Agronomique, UIUC-CMF: University of Illinois Urbana-Champaign Cell and Media Facility. An \* denotes clinical isolates from Carle Foundation Hospital (Urbana, IL).

**Figure S5.** Inhibition of *Bacillus anthracis* spore outgrowth by Hal $\alpha$ , Hal $\beta$ , or nisin. Scale bars equal 5.0  $\mu\text{m}$  for all images.

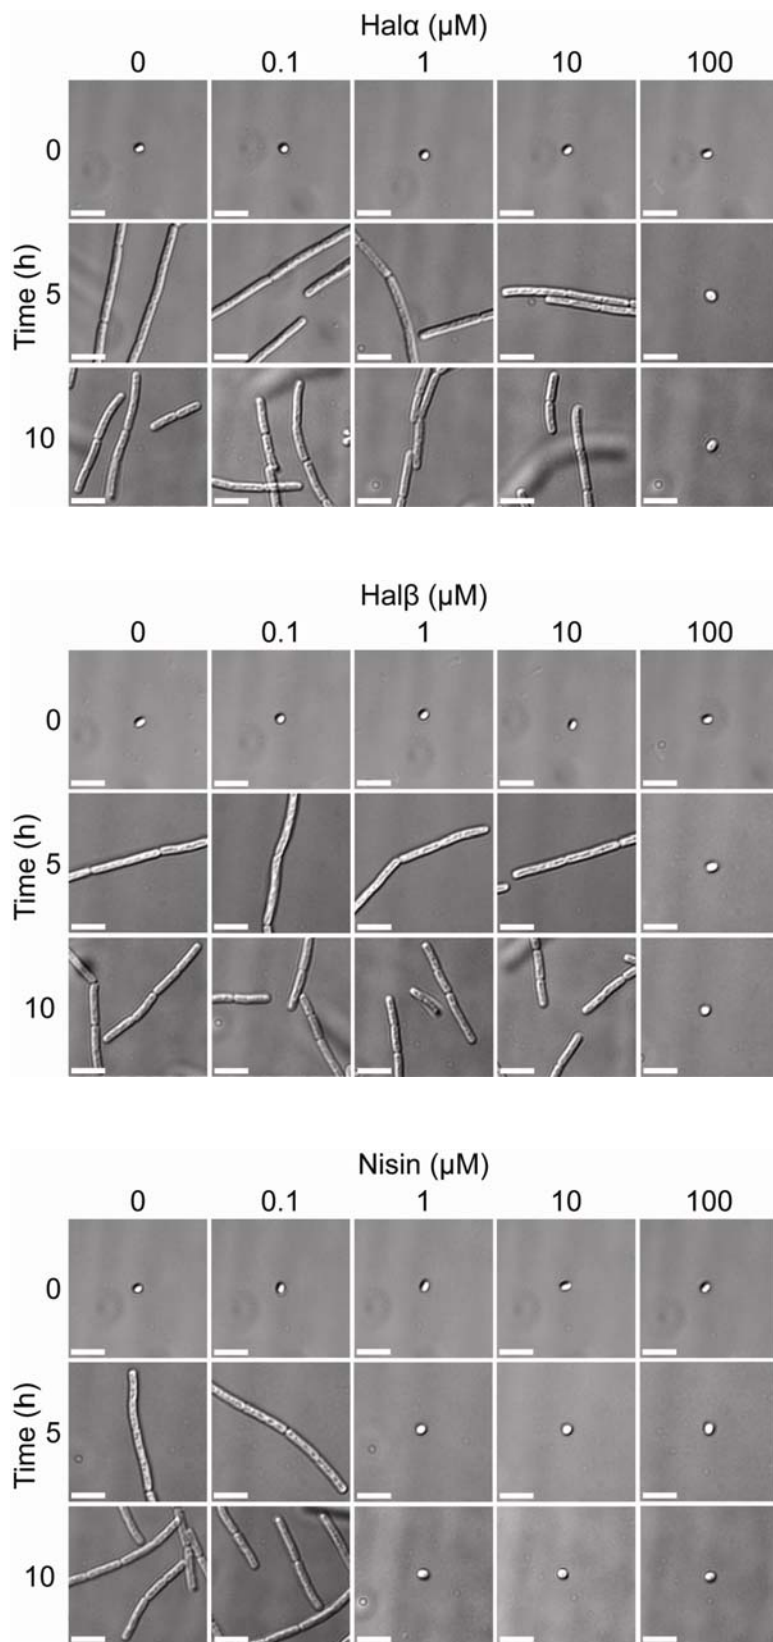

**Figure S6.** Measured dimensions of *Bacillus anthracis* spores.

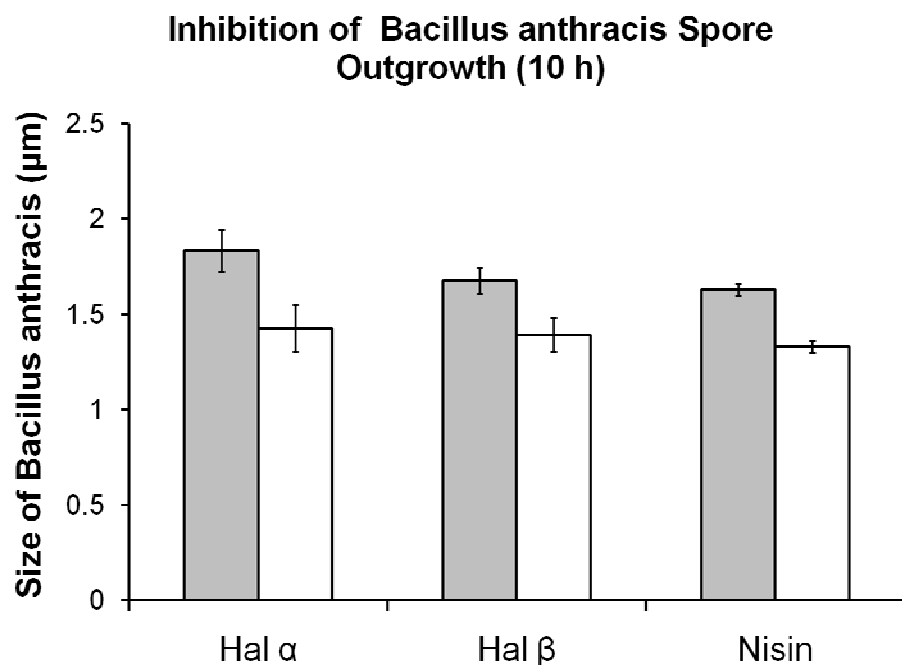

#### **Procedures:**

**Purification of Haloduracin.** A culture of *Bacillus halodurans* C-125 was grown in LB under aerobic conditions for 15 h at 37 °C. Aliquots of the culture (300  $\mu$ L) were removed and plated on Brain Heart Infusion agar plates (15 x 150 mm) and bacteria were grown for 96 h at 30 °C. Agar plates were gently washed with 70% isopropanol in sterile deionized water (v/v) to harvest cells from plates. The cell suspension was incubated for 24 h at 30 °C with vigorous agitation. Cells and debris were removed by centrifugation at 10k x g for 30 min at 4 °C and the haloduracin containing supernatant was concentrated via rotary evaporation. The resultant preparation was filtered using a 0.45  $\mu$ m syringe filter to remove any residual cells or spores. Haloduracin peptides were purified by preparative HPLC performed on a Waters Delta 600 instrument equipped with a Phenomenex Jupiter Proteo C12 column (10  $\mu$ m, 90 Å, 250 mm x 15 mm) equilibrated in 10% B (A: 0.1% TFA in water, B: 0.0866% TFA in 80% ACN/20% water (v/v)). The crude material was applied to the column and haloduracin peptides were eluted by maintaining the mobile phase at 10% B for 5 min, followed by an increase to 100% B over 50 min with a flow rate of 10.0 mL min<sup>-1</sup>. Under these conditions, Hal $\alpha$  and Hal $\beta$  eluted at 30.5 and 32 min, respectively. Hal $\alpha$  fractions containing trace amounts of Hal $\beta$  were further purified by lyophilization, resuspension of the peptide mixture in 50 mM TCEP and incubating at RT for 3 h. This material was re-applied to the preparative HPLC column and further purified using the conditions described above. The reduced Hal $\alpha$  peptide retention time shifted to 27 min whereas the Hal $\beta$  retention time remained unchanged at 32 min. All fractions were analyzed by mass spectrometry performed on a matrix-assisted laser desorption/ionization time-of-flight mass spectrometer (Applied Biosystems Voyager DE-STR). A 1  $\mu$ L aliquot of sample was combined with 1  $\mu$ L of matrix consisting of saturated  $\alpha$ -cyano-4-hydroxycinnamic acid matrix in 50% ACN/50% water with 0.1% TFA, and the total volume was spotted onto a MALDI target and dried under ambient conditions prior to MS analysis. The purified peptides were

lyophilized to dryness and stored under N<sub>2</sub> at -80 °C until further use (See Supp. Info. Figure S1 and Figure S2). Typical yields for the peptides were 2 – 3 mg Hal $\alpha$  and 1.5 – 2 mg Hal $\beta$  per liter of agar.

**Purification of Nisin.** A 500 mg sample of Nisaplin (Danisco) was suspended in 5 mL of 25% acetonitrile with 0.1% TFA and was sonicated for 30 min, followed by centrifugation at 15,000 x g for 10 min to remove insoluble material. Nisin was purified by preparative HPLC using a Waters Delta 600 instrument equipped with a Waters Delta-Pak C4 column (15  $\mu$ m, 100 Å, 100 mm x 25 mm) equilibrated in 2% B (A: 0.1% TFA in water, B: 0.0866% TFA in 80% ACN/20% water (v/v)). The soluble material was applied to the column and nisin was eluted by increasing to 100% B over 45 min with a flow rate of 8.0 mL min<sup>-1</sup>. Nisin eluted at 28 min. All fractions were analyzed by MALDI-TOF mass spectrometry as described above. The purified peptide was lyophilized to dryness and stored under N<sub>2</sub> at -80 °C until further use (See Supp. Info. Figure S3).

**Preparation of Hal $\alpha$  mutants.** Purified HalA1-Xa peptides were dissolved (final concentration 0.3 mg mL<sup>-1</sup>) in HalM1 assay buffer (50 mM Tris, pH 8.3) containing 10 mM MgCl<sub>2</sub>, 2.5 mM ATP, and 1 mM TCEP. HalM1 enzyme was added (10  $\mu$ M final concentration) and reactions were incubated at 25 °C for 3.5 h. At 3.5 h, complete conversion to dehydrated and cyclized product was observed in the soluble fraction as determined by MALDI-TOF MS. Insoluble material (unmodified peptide) was pelleted via centrifugation, and to the supernatant was added NaCl, CaCl<sub>2</sub>, and Factor Xa protease (final concentrations of 100 mM, 2 mM, and 1.5  $\mu$ g mL<sup>-1</sup>, respectively). Cleavage reactions were incubated at 25 °C for 6 h and were quenched with 1% TFA. Reactions were lyophilized to dryness and resuspended in 10% acetonitrile in water (v/v). Hal $\alpha$  mutant peptides were purified using preparative HPLC and analyzed by MALDI-TOF MS as described above. Specific activities for Hal $\alpha$  mutants were determined against the *L. lactis* HP as described above in combination with wild type Hal $\beta$  peptide obtained from the producing strain. Both Hal $\alpha$  and Hal $\beta$  wild type peptides (in combination) and nisin standards were used as controls.

**Agar diffusion growth inhibition assays.** Solid agar diffusion assays were used to assess antimicrobial activity. An overnight culture of indicator strain was grown in appropriate media and under optimal conditions (Table S1). Ninety-six well agar plates were prepared by combining 20 mL of molten media agar (cooled to 42 °C) with 200  $\mu$ L of dense overnight culture (approx 10<sup>8</sup>-10<sup>9</sup> CFU mL<sup>-1</sup>). The seeded agar was allowed to solidify at 25 °C in a sterile Nunc OmniTray. An additional 20 mL of cooled molten media was combined with 200  $\mu$ L of culture and poured over the lower solidified agar layer. A sterile 96-well PCR plate was placed in the molten agar upper layer, which was allowed to solidify at 25 °C. After sufficient solidification, the 96-well PCR plate was removed, and 15  $\mu$ L of peptide solutions at a range of concentrations were separately dispensed into the newly formed wells. For assays with haloduracin peptides, a 1:1 ratio of Hal $\alpha$ :Hal $\beta$  was used. Plates were left at optimal growth temperature (strain dependent) for 15 h and antibacterial activity was qualitatively determined by the presence or absence of growth inhibition.

**Construction of the isobologram.** Individual peptides were incubated at the concentrations indicated in Figure 2 with the indicator strain *L. lactis* HP and nisin standards were used as controls. Ninety-six well microtiter plates were used for analysis. Serial dilutions of Hal $\alpha$  and Hal $\beta$  peptides were prepared in sterile deionized water (SDW). For assay plates, the total volume in each well was 200  $\mu$ L; the experimental wells contained 50  $\mu$ L of diluted Hal $\alpha$  and Hal $\beta$  peptides at defined concentrations and 150  $\mu$ L of a 1-in-10 dilution (approximately 1 x 10<sup>8</sup> CFU mL<sup>-1</sup>) of a culture of indicator strain diluted in fresh growth medium. In addition, each plate contained several blank (150  $\mu$ L fresh growth medium and

50  $\mu$ L SDW) and control wells (150  $\mu$ L of untreated 1-in-10 diluted culture and 50  $\mu$ L SDW). The optical density at 600 nm ( $OD_{600}$ ) was recorded at hourly intervals from 0 to 5 h with an additional measurement at 18 h. Plates were incubated at 30 °C under anaerobic conditions. The triplicate readings were averaged, and blanks (growth medium and SDW only) were subtracted from these readings.

**Stability tests.** Stock solutions of nisin, Hal $\alpha$ , and Hal $\beta$  were prepared in 50 mM MOPS, 100 mM NaCl at pH 7.5 with final peptide concentrations of 25  $\mu$ M. These stocks were divided into 1 mL aliquots in sterile microcentrifuge tubes and were incubated at 25 °C. At the times indicated, an aliquot was analyzed by reverse-phase HPLC (Beckman Coulter System Gold) and MALDI-TOF MS (Applied Biosystems Voyager DE-STR). Peptide aliquots were applied to a Phenomenex Jupiter Proteo C12 column (10  $\mu$ m, 90 Å, 250 mm x 4.6 mm) equilibrated in 10% B (A: 0.1% TFA in water, B: 0.0866% TFA in 80% ACN/20% water (v/v)). Separation of intact peptide from degradation products was achieved by maintaining the mobile phase at 10% B for 5 min, followed by an increase to 100% B over 50 min with a flow rate of 1.0 mL min<sup>-1</sup>. Fractions were collected and analyzed by MALDI-TOF MS as described above. Peak area corresponding to the intact peptide was determined via integration and plotted as a percentage relative to the peak area of peptide of day 0 (peak area of intact peptide day  $n$  / peak area of intact peptide day 0). Agar diffusion growth assays were performed against *L. lactis* HP as described above. For haloduracin samples, 7.5  $\mu$ L of Hal $\alpha$  (day  $n$ ) was combined with 7.5  $\mu$ L of Hal $\beta$  (day  $n$ ) and the total 15  $\mu$ L was dispensed in the well. For nisin samples, 7.5  $\mu$ L of nisin (day  $n$ ) was combined with 7.5  $\mu$ L of sterile 50 mM MOPS, 100 mM NaCl at pH 7.5 and the total 15  $\mu$ L was dispensed in the well. Positive controls included 15  $\mu$ L of nisin at 20  $\mu$ M, 10  $\mu$ M, 1  $\mu$ M, and 100 nM in sterile buffer.

**Sequential binding assays with Hal $\alpha$  and Hal $\beta$ .** *L. lactis* HP cultures (in triplicate) were diluted 1-in-10 (approximately  $1 \times 10^8$  CFU mL<sup>-1</sup>), and 150  $\mu$ L of each culture was added to 0.6 mL sterile microcentrifuge tubes which contained 50  $\mu$ L of Hal $\alpha$  or Hal $\beta$  alone (at concentrations of 1  $\mu$ M, 500 nM, 250 nM, 100 nM, 10 nM, and 0 nM). Tubes were incubated at 25 °C for 20 min prior to centrifugation at 13,000 x  $g$  for 1 min. The supernatants were removed from each tube and cell pellets were washed twice in fresh GM17 media. Following the second wash, cell pellets were resuspended in 150  $\mu$ L of fresh GM17. Cells treated with Hal $\alpha$  alone were added to microtiter wells, which contained 50  $\mu$ L of Hal $\beta$ , and cells treated with Hal $\beta$  alone were added to microtiter wells that contained 50  $\mu$ L of Hal $\alpha$  (at concentrations of 1  $\mu$ M, 500 nM, 250 nM, 100 nM, 10 nM, and 0 nM). As controls, Hal $\alpha$  and Hal $\beta$  were used in combination and nisin was used at 1  $\mu$ M concentrations. The microtiter plates were incubated at 30 °C and the optical density at 600 nm was recorded at hourly intervals from 0 to 5 h with an additional measurement at 18 h using a BioTek Synergy 2. The triplicate readings were averaged, and blanks (150  $\mu$ L of GM17 media and 50  $\mu$ L SDW) were subtracted from these readings.

**Analysis of inhibition of *Bacillus anthracis* spore outgrowth.** Differential interference contrast (DIC) microscopy images were collected as described in *Methods*. Spore dimensions (length and width) were determined with SoftWoRX Explorer Suite. Averages and standard deviations of spore measurements were determined for each set (Figure S6). To determine if the differences in spore dimensions were significant, a Student's t-test was performed. Significance was defined by  $P < 0.05$ . From this analysis it appears that inhibited spores following Hal $\alpha$  treatment are slightly larger than those following nisin or Hal $\beta$  treatment.

## References

1. Gut, I. M., Prouty, A. M., Ballard, J. D., van der Donk, W. A., and Blanke, S. R. (2008) Inhibition of *Bacillus anthracis* Spore Outgrowth by Nisin *Antimicrob. Agents Chemother.* *52*, 4281-4288.
2. Ekkelenkamp, M. B., Hanssen, M., Danny Hsu, S. T., de Jong, A., Milatovic, D., Verhoef, J., and van Nuland, N. A. (2005) Isolation and structural characterization of epilancin 15X, a novel lantibiotic from a clinical strain of *Staphylococcus epidermidis* *FEBS Lett* *579*, 1917-1922.
3. Kawamura, F., and Doi, R. H. (1984) Construction of a *Bacillus subtilis* double mutant deficient in extracellular alkaline and neutral proteases *J. Bacteriol.* *160*, 442-444.
4. Liu, W., and Hansen, J. N. (1991) Conversion of *Bacillus subtilis* 168 to a subtilin producer by competence transformation *J. Bacteriol.* *173*, 7387-7390.
